# Supplementary material
Source: publisher figshare collection journal article supplement (https://acs.figshare.com/ndownloader/files/5719866)
Supplement: Supplementary file 1 [file 5719866]

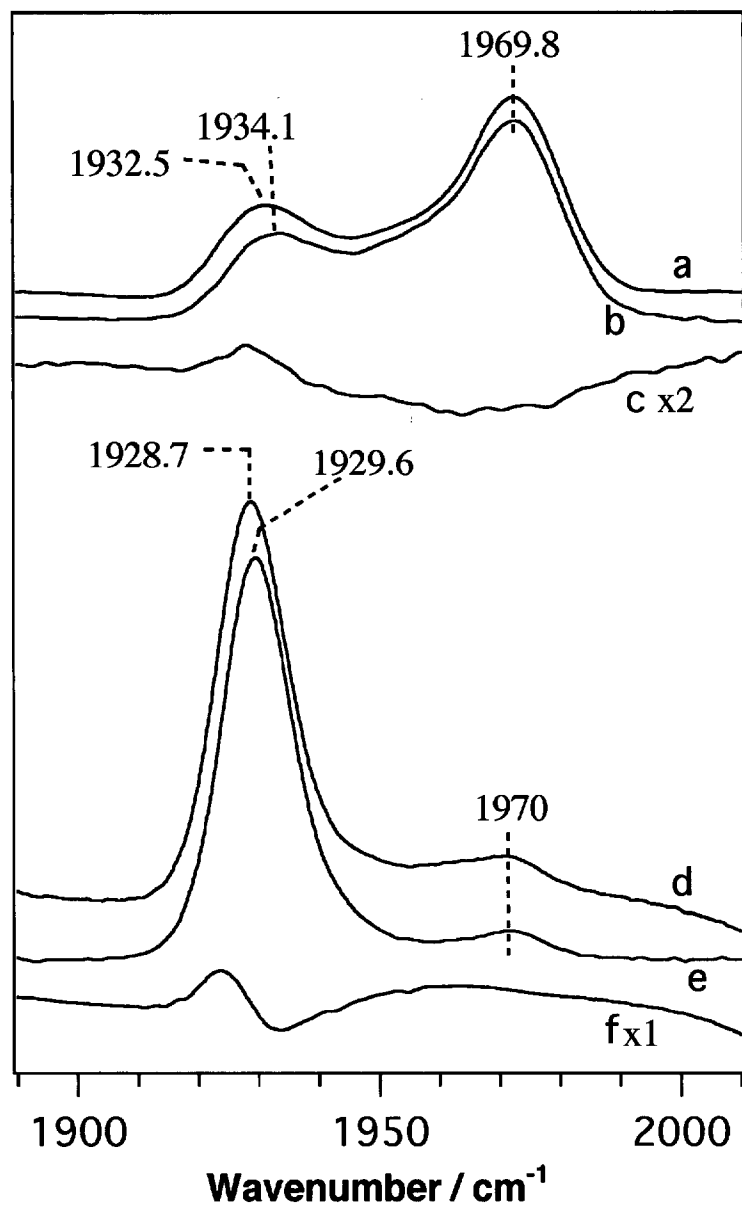

**Supplementary material Ihara et al.**

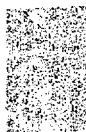

**Legend of Supporting Information** IR spectra of the CO bound form of H39L (a, b and c) and F35V/H39L (d, e and f) obtained at room temperature and at pH8.0. The traces a and d are obtained in 99% D<sub>2</sub>O and the traces b and e are obtained in H<sub>2</sub>O. The traces c and f represent D<sub>2</sub>O-H<sub>2</sub>O difference spectra for H39L and F35V/H39L, respectively.
